# Supplementary material
Source: publisher site journal article supplement (https://www.dovepress.com/article/242432)

CODE................

**Questionnaire regarding pelvic floor muscle training among pregnant women**

**Please mark x at the most appropriate choice**

**Choose only one answer**

**Date………………………………………**

| **I.General information** | | |
| --- | --- | --- |
| 1. Age...............year-old | 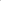  Age  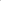 | 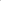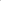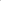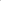 |
| 2. Education level ……..1.Less than primary school  …….2.Primary school  …….3. Secondary school  …….4. Vocational education  ……5.Bachelor’s degree  ……6.> Bachelor’s degree | Edu |  |
| 3. Status 1.Single 2.Married 3.Divorced 4.Widow | 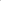  Sta | 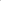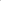 |
| 4. Occupation 1.Housewife 2.Government official 3.Officer 4.Own business 5.Farmer 6.Laborer 7.Unemployed 8.Other................................. | Occ |  |
| 5. The last menstrual period.......................... | 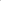  LMP | 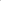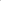 |
| 6. Expected date of confinement.......................... | 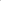  EDC | 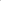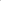 |
| 7.Gestational age......................weeks | GA |  |
| 8. Gravida........................... | Gravida |  |
| 9.The number of vaginal birth ..................................time | 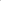  NL | 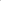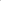 |
| 10.The number of cesarean section.....................................time | CS |  |
| 11. Do you feel that How is your general physical health?  1. Excellent strength 2. Very strong 3. Very good 4. Medium strength 5. Health deterioration | QOL  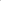 | 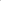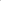 |
| **II.Symptoms caused by pelvic floor dysfunction during pregnancy**. | | |
| 12. Do you have pain in the lower abdomen or not?  1. None 2. Yes, but without affecting everyday life 3. Has a slight order 4. Has a moderate order 5. Very important | 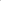  Pain | 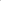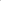 |
| 13. Do you have a lump emerging from your vagina?  1. None 2. Yes, but without affecting everyday life 3. Has a slight order 4. Has a moderate order 5. Very important | Lump |  |
| 14. Do you have urinary incontinence problems (such as coughing / sneezing leak, difficulty urinating, frequent urination, urgency urinary incontinence, incomplete emptying, etc.)?  1. None 2. Yes, but without affecting everyday life 3. Has a slight order 4. Has a moderate order 5. Very important | LUTS |  |
| 15. Do you have problems with defecation (such as having constipation, fecal urgency, fecal incontinence, etc.)?  1. None 2. Yes, but without affecting everyday life 3. Has a slight order 4. Has a moderate order 5. Very important | Anal  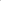 | 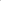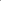 |

| 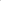  **Part 1**  **III. Pelvic floor muscle training** | | |
| --- | --- | --- |
| 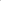**Knowledge** | | |
| 16. Do you know about pelvic floor muscle exercises?  1. Know 2. Don't know. Skip to Part 2. | 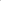  Know  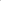 | 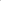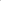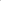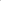 |
| 17. Do you know about pelvic floor exercise from who? (can answer more than 1)  1. Husband 2. Family member 3. Friend  4. Doctors 5. Hospital personnel  6. Various media in the hospital 7. Non-hospital media such as TV, radio, internet | Who |  |
| 18. **Do you think exercising the pelvic floor muscles is a great practice What area of ​​muscles?**  1. the muscles around the genitals 2. Muscles around the anus 3. Abdominal muscles 4. Front leg muscles 5. Back muscles 6. Don't know | 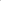  Muscle  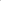 | 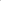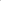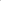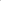 |
| 19. When exercising the pelvic floor muscles, how should you breathe?  1. Breathing normally while contracting the muscles 2. Hold your breath while contracting the muscles. 3. Inhale while contracting the muscles. Exhale while loosening 4. unknown | Breath |  |
| 20. While exercising the pelvic floor muscles, you should contract your abdominal muscles together. While exercising the pelvic floor muscles?  1. Should 2. Should not 3. Don't know | 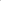  Abd  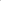 | 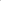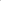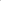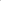 |
| 21. Proper posture While exercising the pelvic floor muscles is? 1. Sleeping position only 2. Sitting position only 3. Standing position only 4. Any position 5. Unknown | Position |  |
| 22. The benefit of exercising the pelvic floor muscles is?  1. Reduce incidence of urinary incontinence while coughing and sneezing 2. Easy birth 3. Not constipation 4. Not known | Advan |  |
| 23. The disadvantage of exercising the pelvic floor muscles is?  1. pain while having a sexual intercourse 2. difficult stools 3. Cause pelvic pain 4. No complication 5. Don't know | Disad |  |
| 24. Can pregnant women exercise the pelvic floor muscles?  1. Yes 2. No 3. Unknown | Preg |  |

**Part 2**

| **Attitude** | | |
| --- | --- | --- |
| **How do you think exercising your pelvic floor muscles can affect pregnancy?** | | |
| 25. Causing preterm birth  1. Yes 2. No | Preterm | 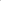 |
| 26. Helps to give birth easier  1. Yes 2. No | Pricipitate | 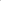 |
| 27. Makes it difficult to give birth  1. Yes 2. No | Difficult | 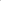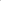 |
| 28. Causing the baby to die from lack of oxygen  1. Yes 2. No | Danger | 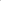 |
| 29. Helps to reduce vaginal tear in cases of vaginal birth  1. Yes 2. No | Tear | 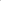 |
| **How do you think exercising your pelvic floor muscles can affect the following conditions?** | | |
| 30. Sexual emotion 1. Much improved 2. Slightly improved 3. unchanged 4. Slightly worse 5. Very worse | Emotion | 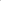 |
| 31. Sexual satisfaction 1. Much improved 2. Slightly improved 3. unchanged 4. Slightly worse 5. Very worse | Sex | 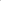 |
| 32.Pelvic pain 1. Much improved 2. Slightly improved 3. unchanged 4. Slightly worse 5. Very worse | LAP | 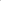 |
| 33.Stress urinary incontinence 1. Much improved 2. Slightly improved 3. unchanged 4. Slightly worse 5. Very worse | 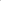  SUI |  |
| 34.Urgency or urgency urinary incontinence 1. Much improved 2. Slightly improved 3. unchanged 4. Slightly worse 5. Very worse | 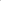  UUI |  |
| 35.Urinary retention or voiding difficulty 1. Much improved 2. Slightly improved 3. unchanged 4. Slightly worse 5. Very worse | 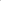  VD |  |
| 36.Pelvic organ prolapse 1. Much improved 2. Slightly improved 3. unchanged 4. Slightly worse 5. Very worse | POP |  |
| 37.Constipation 1. Much improved 2. Slightly improved 3. unchanged 4. Slightly worse 5. Very worse | CON |  |
| 38.Fecal urgency or fecal incontinence 1. Much improved 2. Slightly improved 3. unchanged 4. Slightly worse 5. Very worse | FI |  |
| 39.General health 1. Much improved 2. Slightly improved 3. unchanged 4. Slightly worse 5. Very worse | GQOL |  |

| **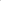Practice** | | |
| --- | --- | --- |
| 40. If you know the benefits of pelvic floor exercise and the way to do the exercise, How often will you manage the pelvic floor muscles?  1. Don't do it 2. Do it sometimes 3. Once a week 4.3-4 times a week 5. Do it every day | Fre | 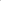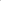 |
| 41. The motivation for exercising your pelvic floor muscles is  1. No  2. Prevent the occurrence of coughing, sneezing, urinary incontinence 3. Want to recover from coughing, sneezing, urinary incontinence 4. Have fun while having sex 5. Others ........................... | Sti |  |
| 42. What factors helped you able to manage the pelvic floor muscles consistently  1.There are people who remind regularly. 2. Seeing the benefits from training 3. Do not want the disease to be repeated 4. Avoid surgery 5. Fear of curing from illness  6. Other ..................... | Fac | 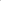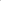 |
| 43. Factors that affect your decision in choosing to practice pelvic floor exercises (Answer more than one)  1. Yourself 2. Husband 3. Family members 4. Friends 5. Doctor  6. Various media in hospitals  7. Hospital personnel  8. Non-hospital media such as TV, radio, internet | Whofac |  |
| 44. Have you ever done pelvic floor exercises?  1. Yes (1.1regularly or 1.2irregularly) 2. No | PFMT | 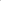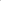 |

Thank you for your cooperation.


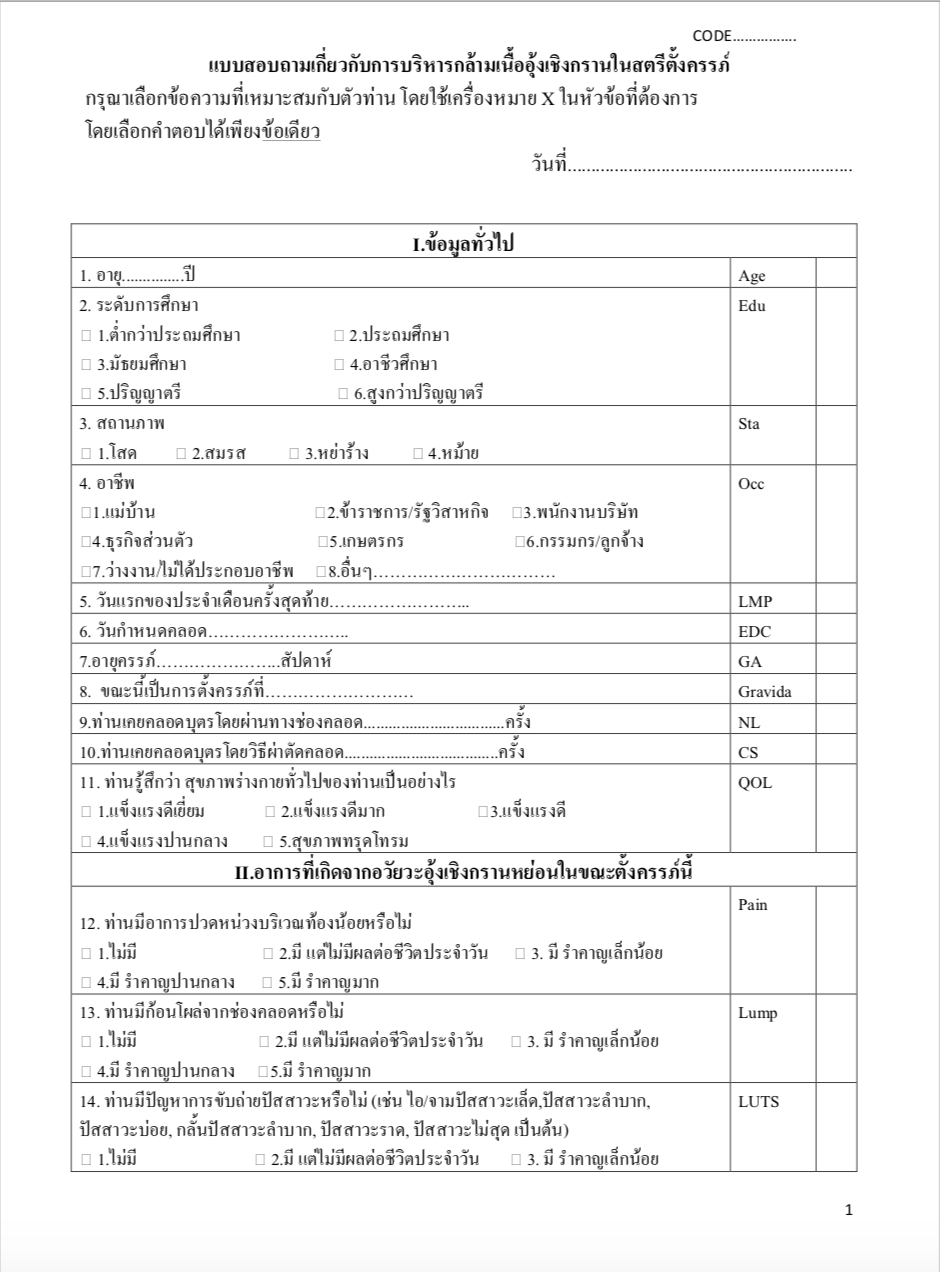

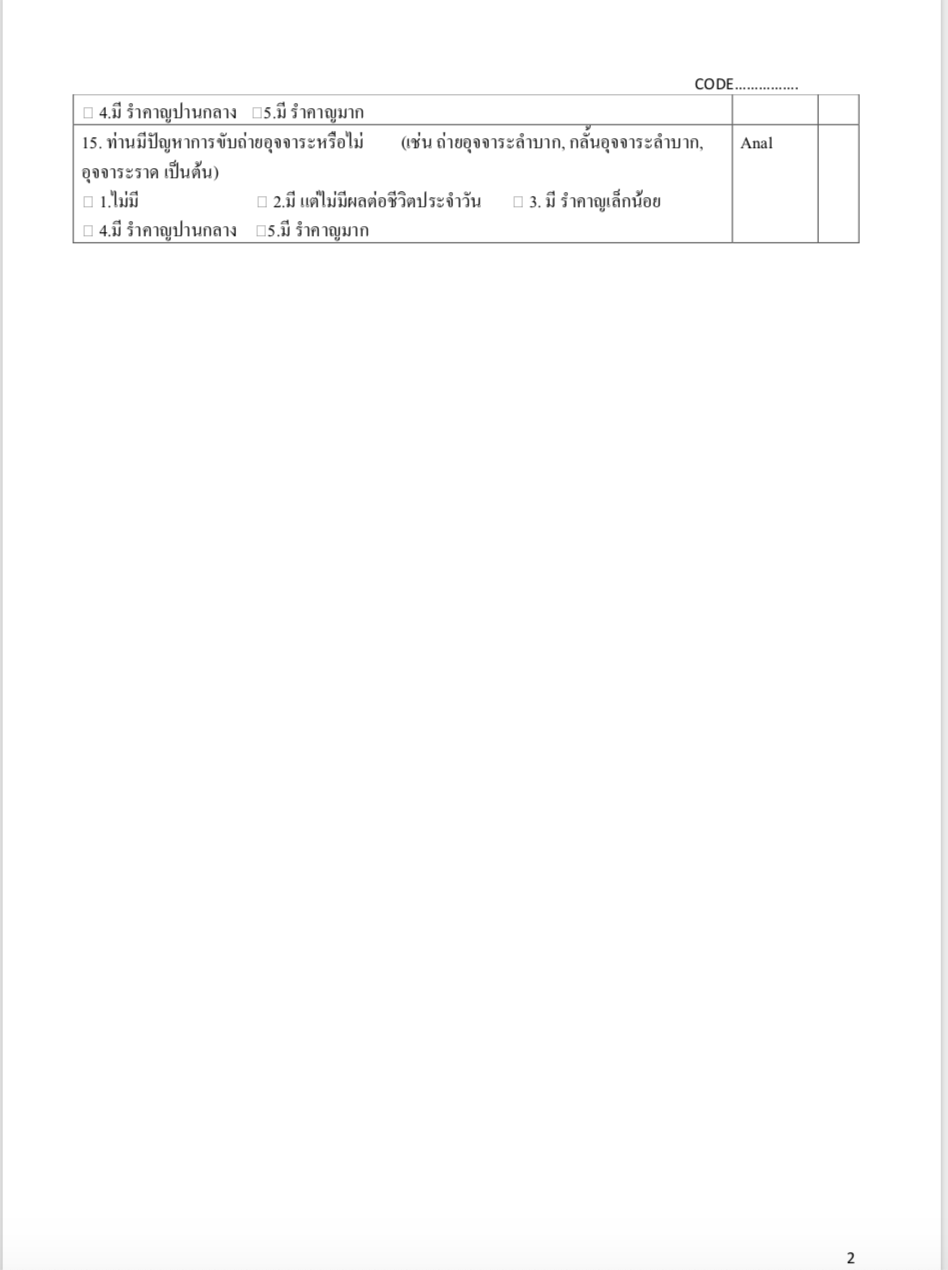

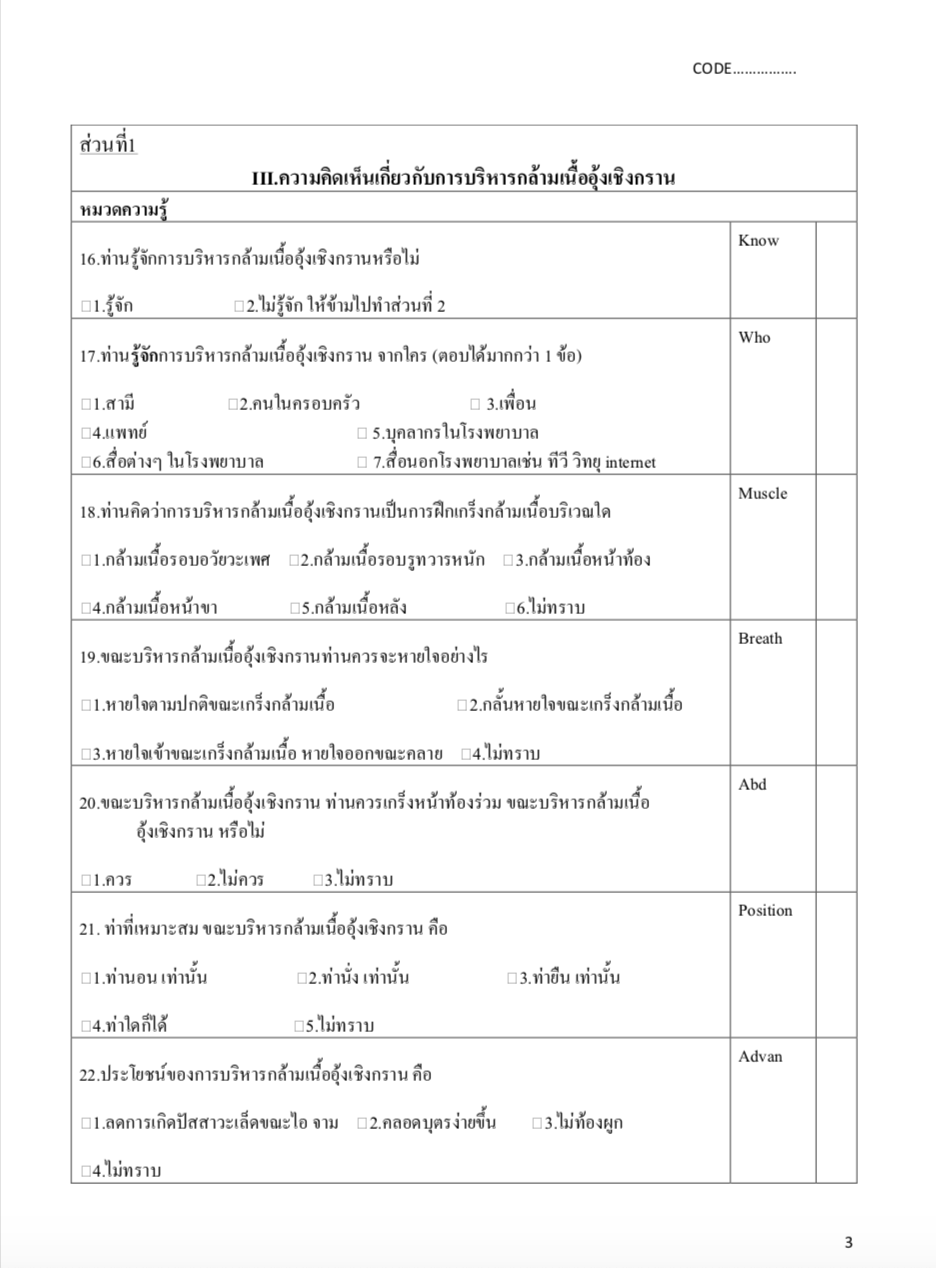

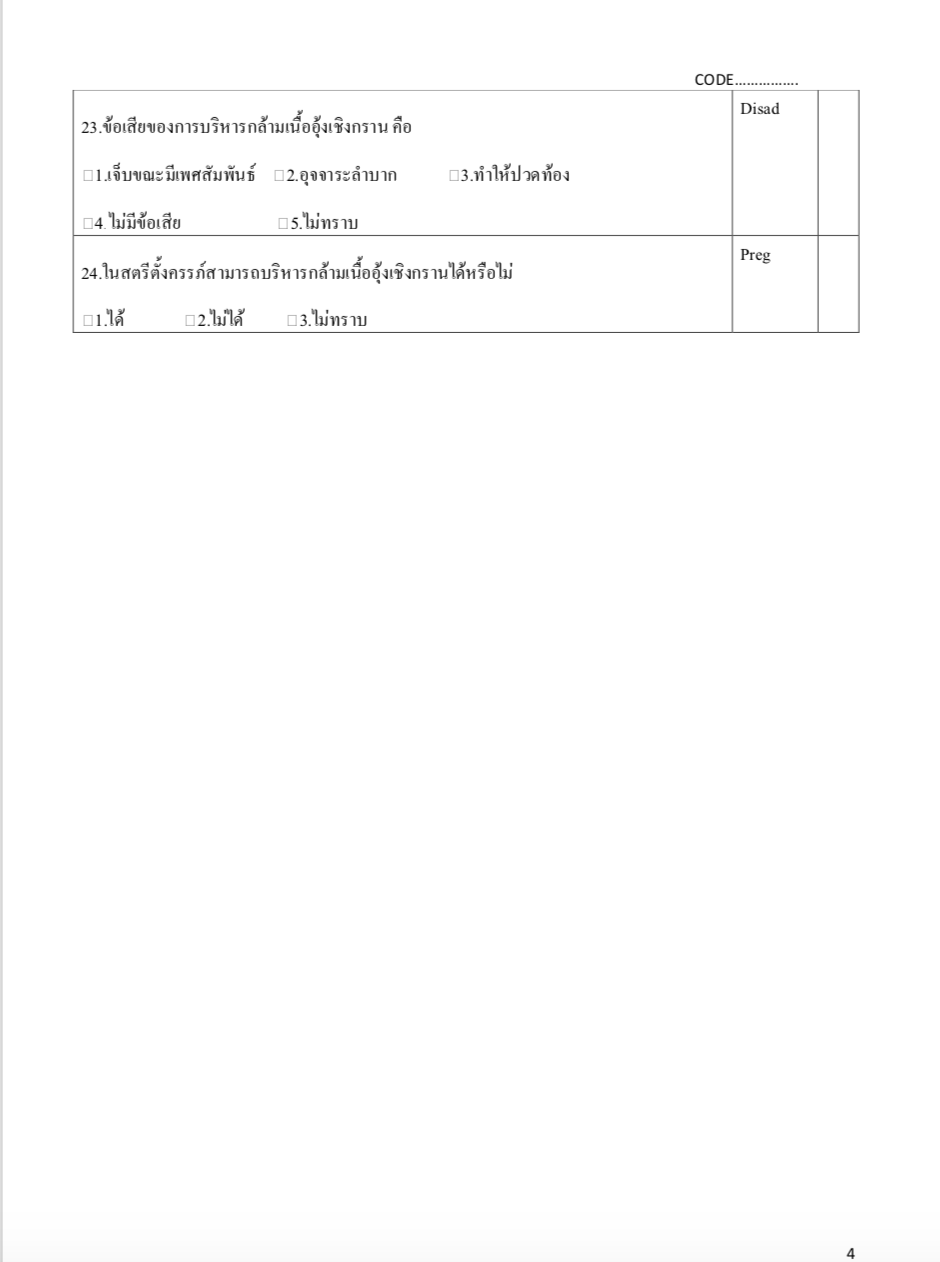

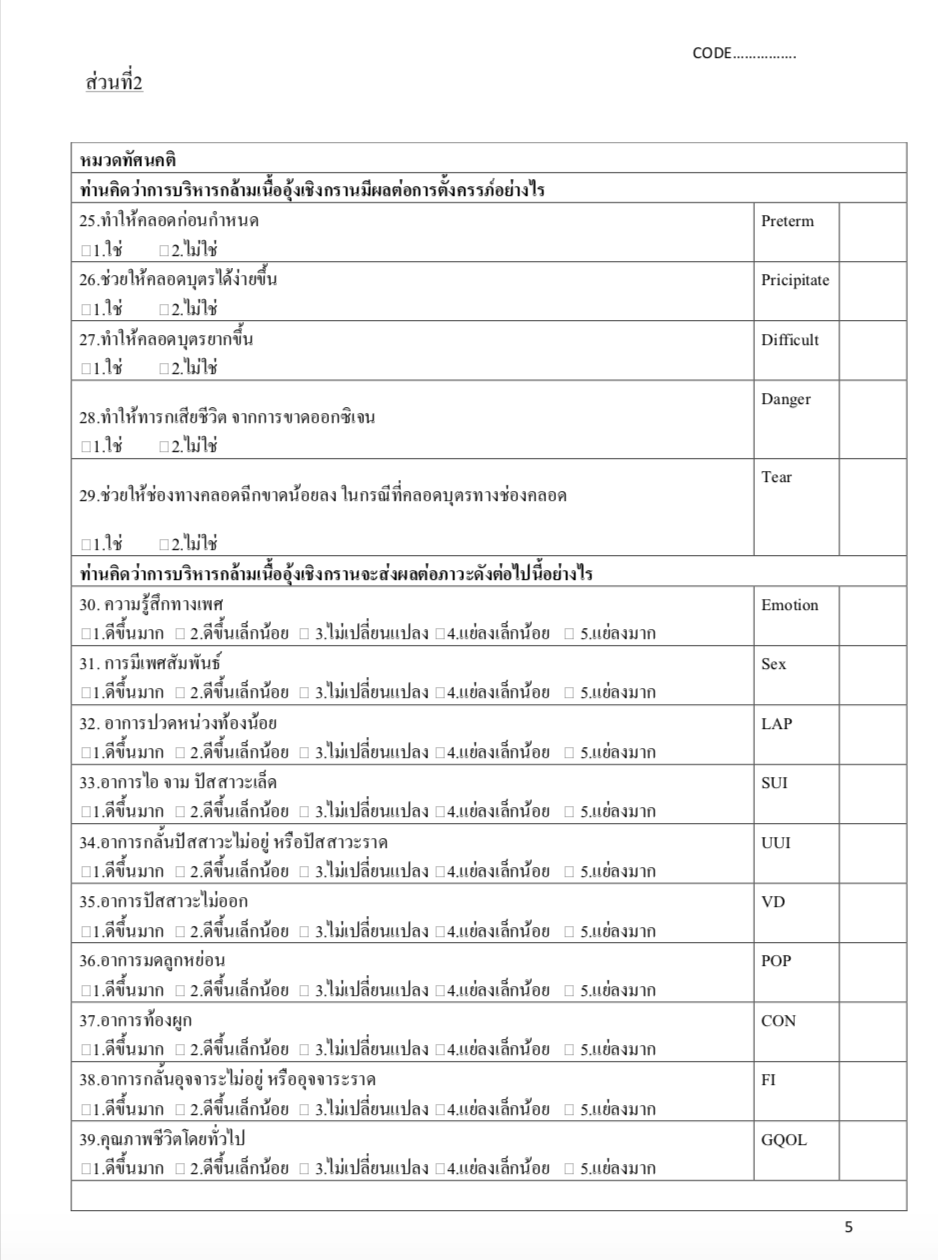

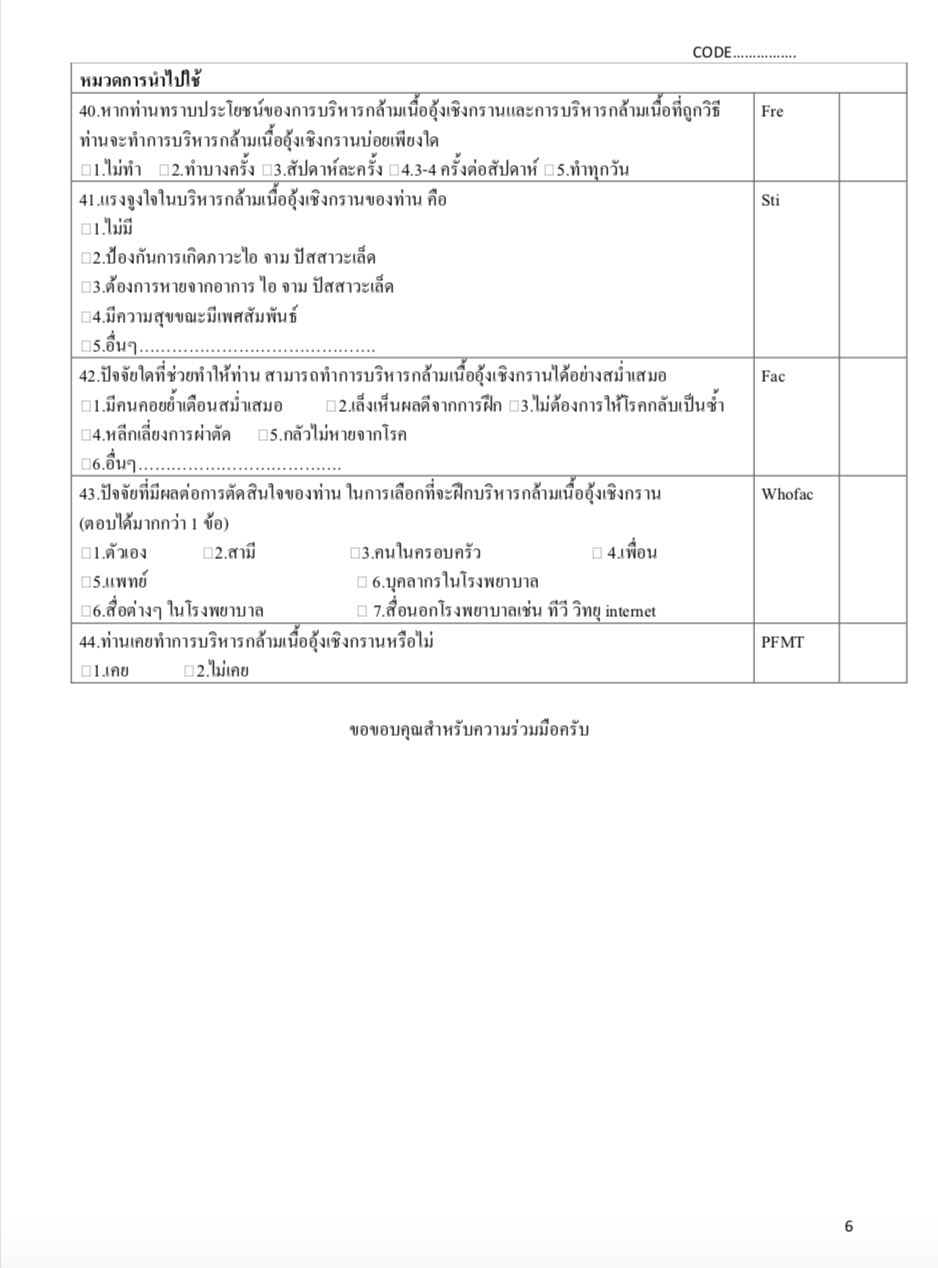

Supplement: Supplementary file 1 [file get_supplementary_file.php]
